# Supplementary material for: Combining hippocampal volume metrics to better understand Alzheimer’s disease progression in at-risk individuals
Source: PubMed Central journal article supplement (PMC6522521; doi:10.1038/s41598-019-42632-w), 2019-05-16
Supplement: 41598_2019_42632_MOESM1_ESM.pdf [file 41598_2019_42632_MOESM1_ESM.pdf]

Title Page

## **Combining hippocampal volume metrics to better understand**

## **Alzheimer's disease progression in at-risk individuals**

McRae-McKee K.<sup>1,\*</sup>, Evans, S.<sup>1</sup>, Hadjichrysanthou, C.<sup>1</sup>, Wong, MM.<sup>1</sup>, de Wolf, F.<sup>1,2</sup>, and Anderson,

RM.<sup>1</sup>, for the Alzheimer's Disease Neuroimaging Initiative

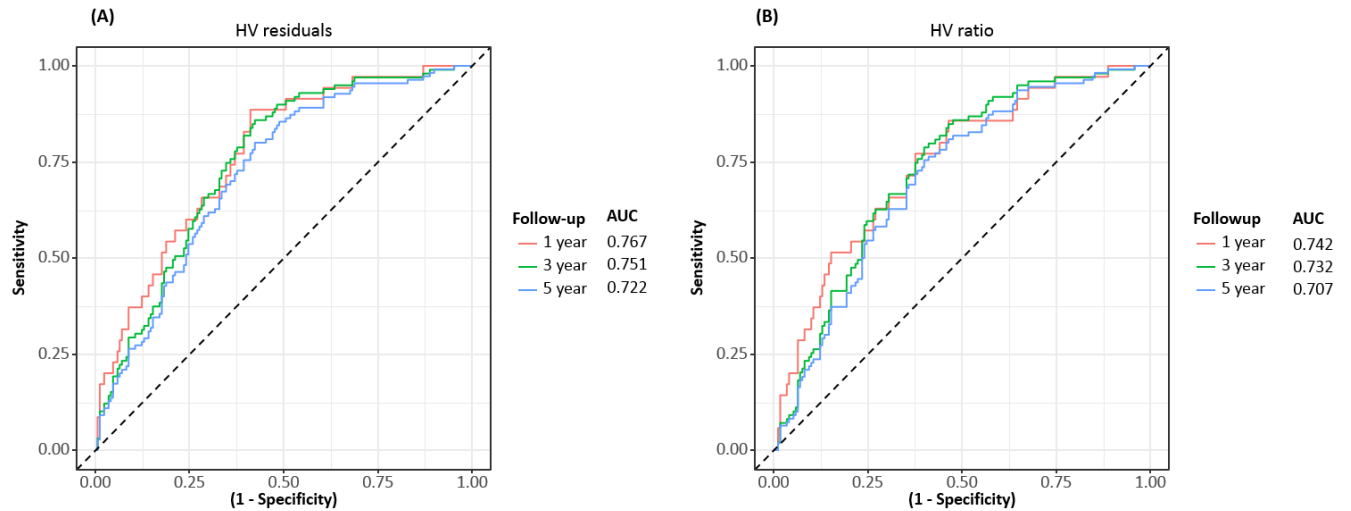

**Supplementary Figure S1:** ROC curves for (A)  $HV_{res}$  and (B)  $HV_{ratio}$  with associated AUC estimates. The red, green and blue curves represent events within 1, 3 and 5 years respectively. Abbreviations: AUC = Area Under Curve.

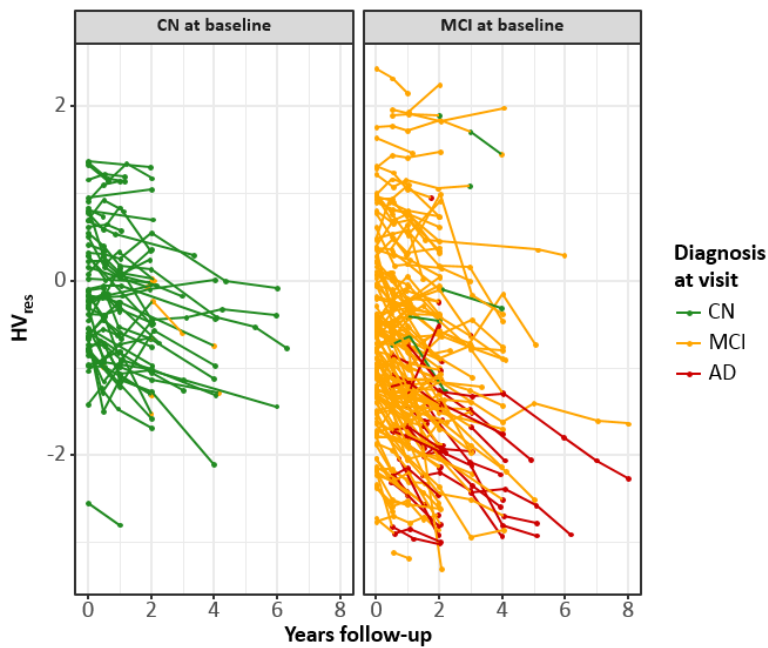

**Supplementary Figure S2:**  $HV_{res}$  over time for a random sample of individuals (200/561). Separate figures represents baseline diagnoses of either CN or MCI whereas colours within figure represent the diagnosis at each individual visit over time.
